# Supplementary material for: Highly Enhanced Photoreductive Degradation of Polybromodiphenyl Ethers with g-C3N4/TiO2 under Visible Light Irradiation
Source: MDPI journal article supplement (doi:10.3390/nano7040076), 2017-04-03
Supplement: s1 [file s1]

# Highly Enhanced Photoreductive Degradation of Polybromodiphenyl Ethers with g-C<sub>3</sub>N<sub>4</sub>/TiO<sub>2</sub> under Visible Light Irradiation

Weidong Ye <sup>1</sup>, Yingying Shao <sup>1</sup>, Xuefeng Hu <sup>2</sup>, Chulin Liu <sup>1</sup> and Chunyan Sun <sup>1,\*</sup>

<sup>1</sup> Department of Chemistry, Shaoxing University, Shaoxing 312000, Zhejiang, China; zjpiyeweidong@163.com (W.Y.); hmilyariel@icloud.com (Y.S.); liuchunlin@usx.edu.cn (C.L.)

<sup>2</sup> Key laboratory of Coastal Zone Environmental Process and Ecological Remediation, Yantai Institute of Coastal Zone Research, Chinese Academy of Sciences, Yantai 264003, Shandong, China; xfhu@yic.ac.cn

\* Correspondence: chunyansun74@gmail.com; Tel./Fax: 86-575-8834-1521

## Supporting Information

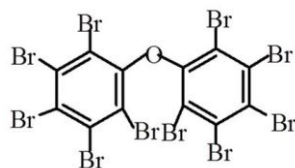

Figure S1. The structure of BDE209

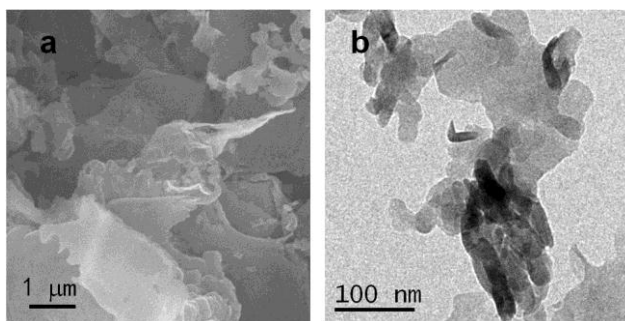

Figure S2 (a) SEM image of g-C<sub>3</sub>N<sub>4</sub>; (b) TEM image of g-C<sub>3</sub>N<sub>4</sub>

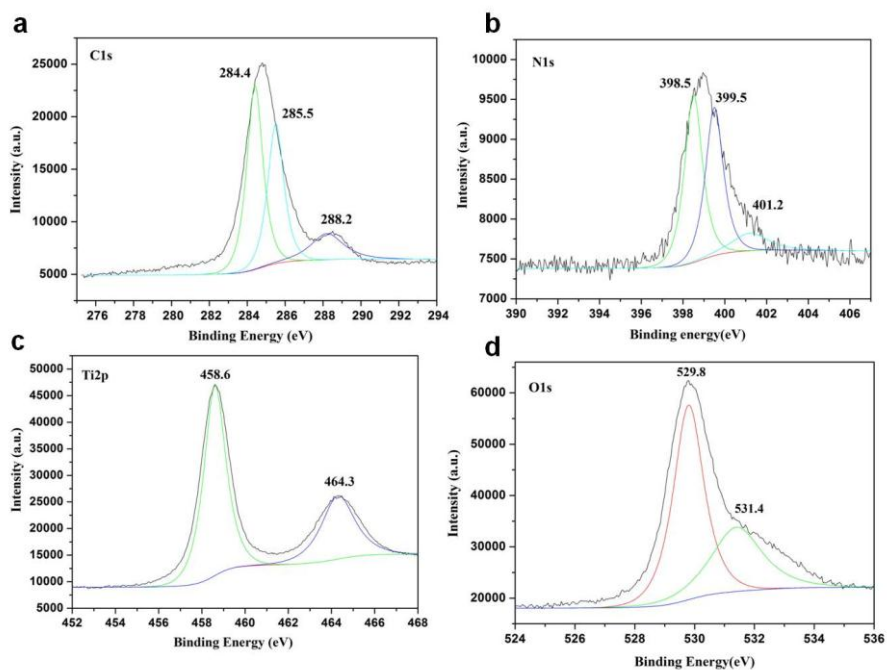

Figure S3. XPS spectra of C1s (a), N1s (b), Ti2p (c) and O1s (d) for 0.02-C<sub>3</sub>N<sub>4</sub>-TiO<sub>2</sub>

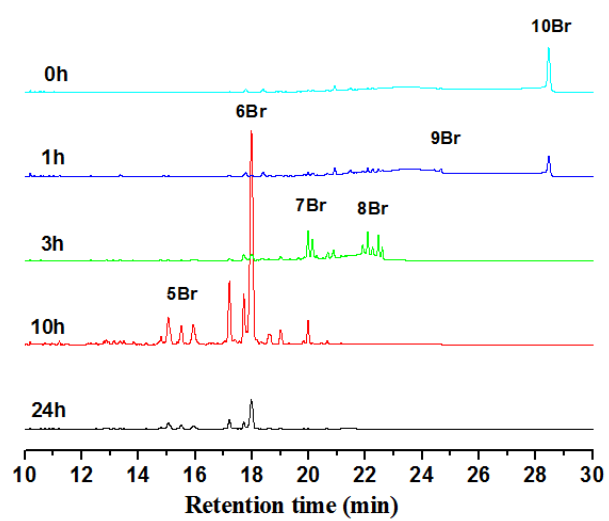

Figure S4 GC- $\mu$ ECD chromatograms of degradation products of BDE209 by 0.02-g- $C_3N_4$ - $TiO_2$  in different irradiation times.
